# Supplementary material for: NKG2A Expression among CD8 Cells Is Associated with COVID-19 Progression in Hypertensive Patients: Insights from the BRACE CORONA Randomized Trial
Source: MDPI journal article supplement (doi:10.3390/jcm11133713), 2022-06-27
Supplement: s1 [file s1]

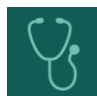

# Supplementary Materials

## 1. Supplementary Data

### 1.1. Inclusion Criteria

- Patients aged  $\geq 18$  years and hospitalized with confirmed diagnoses of 2019 coronavirus disease (COVID-19) who were using angiotensin receptor blockers or angiotensin-converting enzyme inhibitors.
- Ability of the patient (or legal representative) to provide informed consent in accordance with the International Council for Harmonization of Technical Requirements for Pharmaceuticals for Human Use Good Clinical Practice guidelines and local legislation and/or regulations.

### 1.2. Exclusion Criteria

- Hospitalization due to decompensated heart failure in the last 12 months.
- Use of more than three anti-hypertensive drugs.
- Use of sacubitril/valsartan.
- Requirement for mechanical ventilation.
- Hemodynamic instability in the 24 hours before COVID-19 diagnosis confirmation, acute renal failure, or shock.

## 2. Supplementary Tables and Figures

### 2.1. Supplementary Tables

**Table S1.** Disease severity according to modified WHO scores \*.

| Patient State               | Descriptor                                       | Score |
|-----------------------------|--------------------------------------------------|-------|
| Uninfected                  | No clinical or virological evidence of infection | 0     |
| Ambulatory                  | No limitation of activities                      | 1     |
|                             | Limitation of activities                         | 2     |
| Hospitalized—mild disease   | Hospitalized, no oxygen therapy                  | 3     |
|                             | Oxygen by mask or nasal prongs                   | 4     |
|                             | Non-invasive ventilation or high-flow oxygen     | 5     |
| Hospitalized—severe disease | Intubation and mechanical ventilation            | 6     |
|                             | Ventilation + vasopressors, dialysis, or ECMO    | 7     |
| Dead                        | Death                                            | 8     |

\* Modified WHO Ordinal Scale for Clinical Improvement. ECMO, extracorporeal membrane oxygenation; WHO, World Health Organization. Modified from WHO R&D blueprint: COVID-19 Therapeutic Trial Synopsis [22].

**Table S2.** Antibodies used for cell staining \*.

| Marker | Fluorochrome | Maker            | PartNum       |
|--------|--------------|------------------|---------------|
| CD3    | APC          | Exbio            | 1A-514-T100   |
| CD4    | PerCP-Cy5.5  | BD               | 341654/341653 |
| CD8    | PE-Cy7       | Exbio            | T7-207-T100   |
| CD14   | APC-H7       | Exbio            | T4-293-T100   |
| CD16   | PacB         | BioLegend        | 302032        |
| CD19   | PE-Cy7       | Beckman Coulter  | IM3628        |
| CD38   | APC-H7       | Exbio            | T4-366-T100   |
| CD45   | PacO         | Exbio            | PO-684-T100   |
| CD56   | PerCP-Cy5.5  | BioLegend        | 318322        |
| HLA-DR | PacB         | BioLegend        | 307633        |
| NKG2A  | PE           | Beckman Coulter  | IM3291U       |
| ZG     |              | <i>BioLegend</i> | 423111        |

\* Aliquots of  $1 \times 10^6$  cells.

**Table S3.** Degrees of lung involvement on admission.

| Lung involvement* | Total<br><i>n</i> (%) | Oxygen saturation    |                      |
|-------------------|-----------------------|----------------------|----------------------|
|                   |                       | >93%<br><i>n</i> (%) | ≤93%<br><i>n</i> (%) |
| ≤25%              | 93 (59.6)             | 82 (52.6)            | <b>11 (7.1)</b>      |
| 26 to 50%         | 56 (35.9)             | 42 (26.9)            | <b>14 (9.0)</b>      |
| >50%              | <b>7 (4.5)</b>        | <b>2 (1.3)</b>       | <b>5 (3.2)</b>       |
| Total             | 156 (100.0)           | 126 (80.8)           | 30 (19.2)            |

\* On computed tomography (CT) examination. Bold values indicate significant lung involvement (oxygen saturation ≤ 93% or >50% on CT).

**Table S4.** Progression to severe disease according to WHO scores.

| WHO Score*                                                    | Frequency      |              |            |
|---------------------------------------------------------------|----------------|--------------|------------|
|                                                               | Original Scale | Grouped      |            |
|                                                               | <i>n</i> (%)   | <i>n</i> (%) | 95% CI     |
| 3 = Hospitalized with no oxygen                               | 77 (49.4)      | 77 (49.4)    | 41.6–57.2% |
| 4 = Hospitalized + oxygen, no ventilatory support             | 56 (35.9)      | 68 (43.6)    | 36.0–51.4% |
| 5 = Hospitalized + non-invasive ventilatory support           | 12 (7.7)       |              |            |
| 6 = Hospitalized + mechanical ventilation                     | 0 (0.0)        | 11 (7.1)     | 3.8–11.9%  |
| 7 = Hospitalized + mechanical ventilation + inotropic support | 8 (5.1)        |              |            |
| 8 = Death                                                     | 3 (1.9)        |              |            |
| Total                                                         | 156 (100.0)    | 156 (100.0)  |            |

\* Modified WHO Ordinal Scale for Clinical Improvement.

**Table S5.** LOSs in the hospital and ICU.

| WHO Score *             |                                 | Descriptive Statistics |         |        |         |
|-------------------------|---------------------------------|------------------------|---------|--------|---------|
|                         |                                 | Mean (SD)              | Minimum | Median | Maximum |
| Total ( <i>n</i> = 156) | Total ( <i>n</i> = 156)         | 5.6 (3.1)              | 0.0     | 5.0    | 17.0    |
| Days of symptoms †      | scores 3 to 5 ( <i>n</i> = 145) | 5.7 (3.1)              | 0.0     | 5.0    | 17.0    |
|                         | scores 6 to 8 ( <i>n</i> = 11)  | 4.4 (2.4)              | 0.0     | 4.0    | 9.0     |
| LOS in hospital         | Total ( <i>n</i> = 156)         | 9.1 (6.8)              | 2.0     | 7.0    | 33.0    |
|                         | score 3 to 5 ( <i>n</i> = 145)  | 7.7 (4.3)              | 2.0     | 6.0    | 31.0    |
|                         | scores 6 to 8 ( <i>n</i> = 11)  | 27.6 (7.0)             | 12.0    | 31.0   | 33.0    |
| LOS in ICU ‡            | Total ( <i>n</i> = 111)         | 7.6 (6.8)              | 2.0     | 5.0    | 34.0    |
|                         | score 3 to 5 ( <i>n</i> = 100)  | 5.9 (4.1)              | 2.0     | 5.0    | 28.0    |
|                         | scores 6 to 8 ( <i>n</i> = 11)  | 23.1 (7.3)             | 11.0    | 25.0   | 34.0    |

ICU, intensive care unit; LOS, length of stay; SD, standard deviation. \* Modified WHO Ordinal Scale for Clinical Improvement; † Pre-hospitalization; ‡ 45 (28.8%) patients did not stay in the ICU.

## 2.2. Supplementary Figures

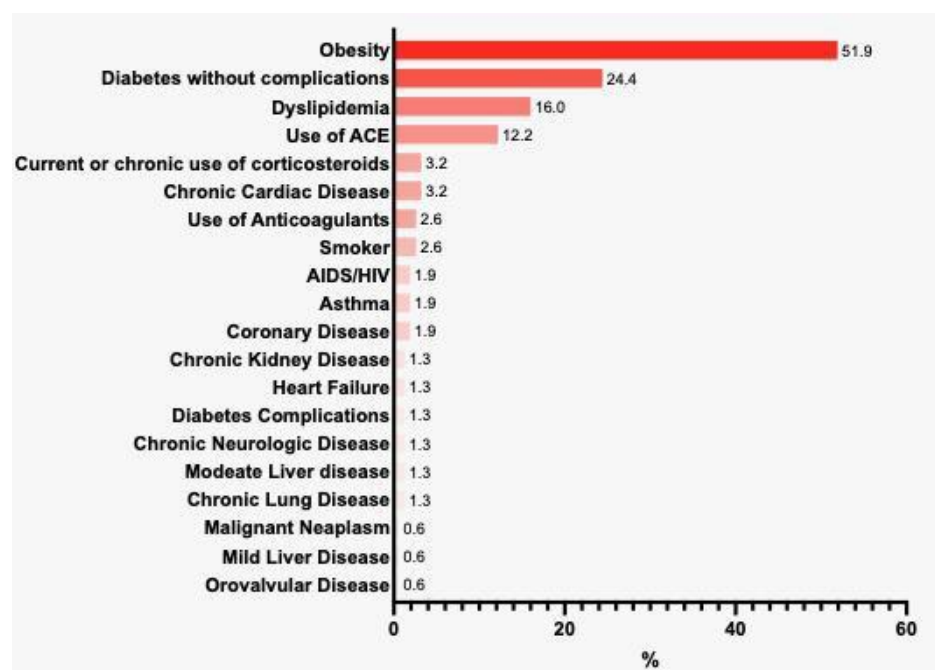

**Figure S1.** Comorbidities at admission (%).

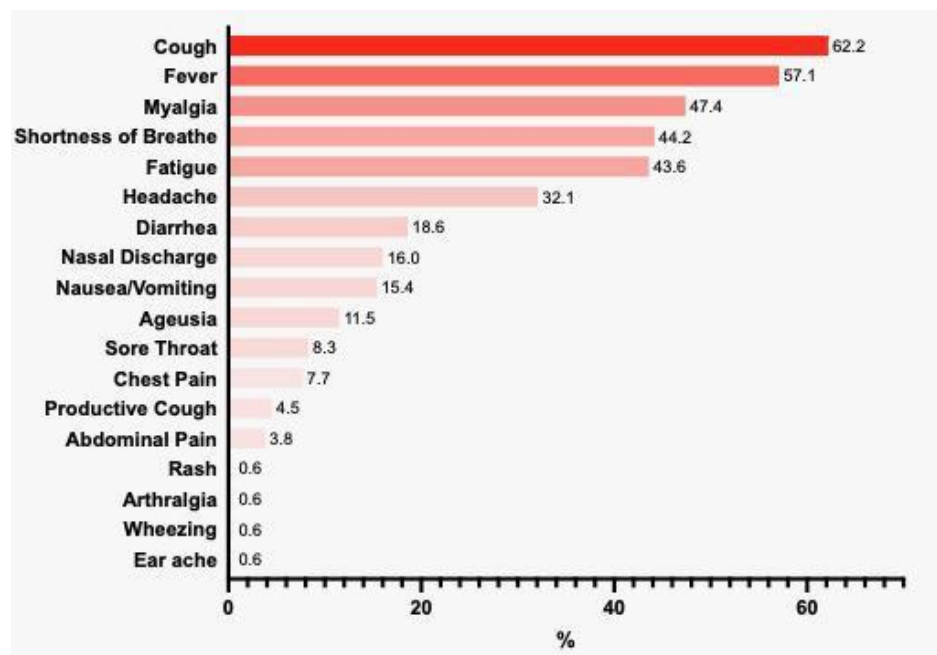

Figure S2. Symptoms at presentation (%).
